# Supplementary material
Source: PubMed Central journal article supplement (PMC3959172)

*HighLD, c=12 causal variants, alpha=0.001*

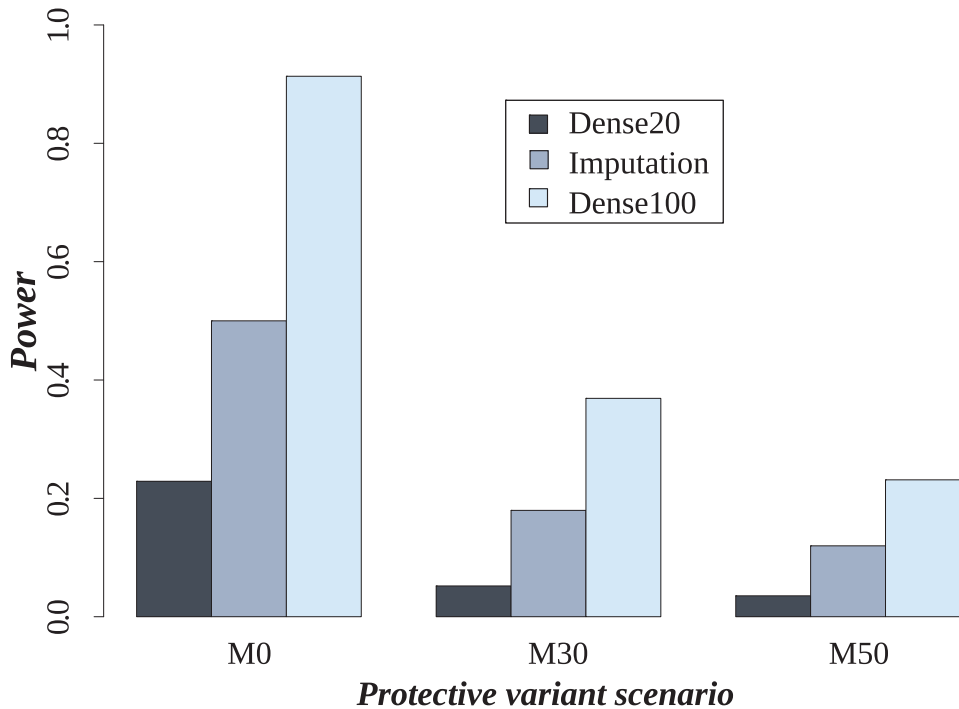

Supplement: NIHMS554262-supplement-Fifgure_S10.pdf [file NIHMS554262-supplement-Fifgure_S10.pdf]

# *Minor Allele Frequency*

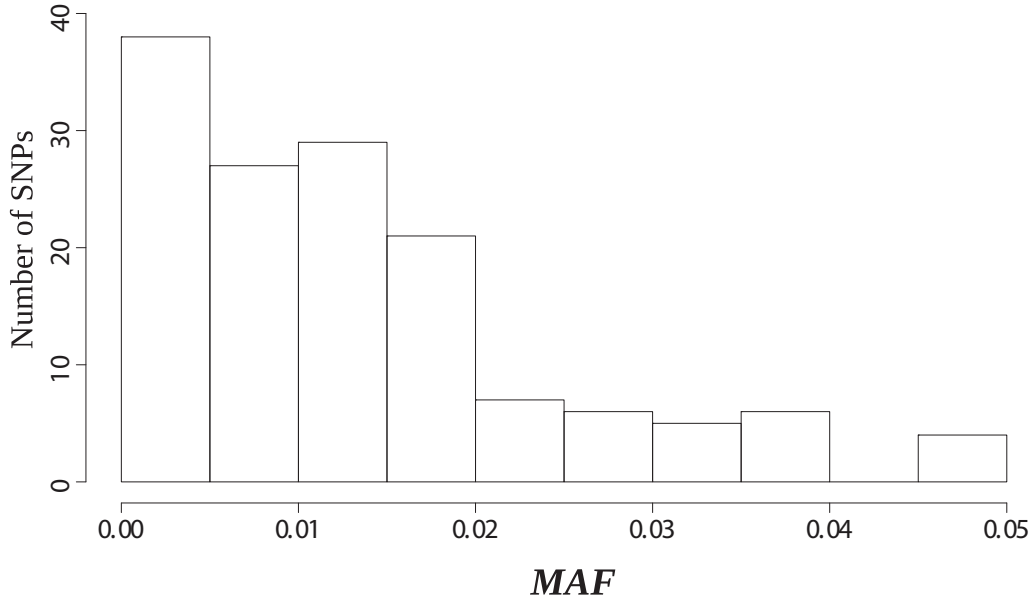

Supplement: NIHMS554262-supplement-Figure_S1.pdf [file NIHMS554262-supplement-Figure_S1.pdf]

*MedLD, alpha=0.001*

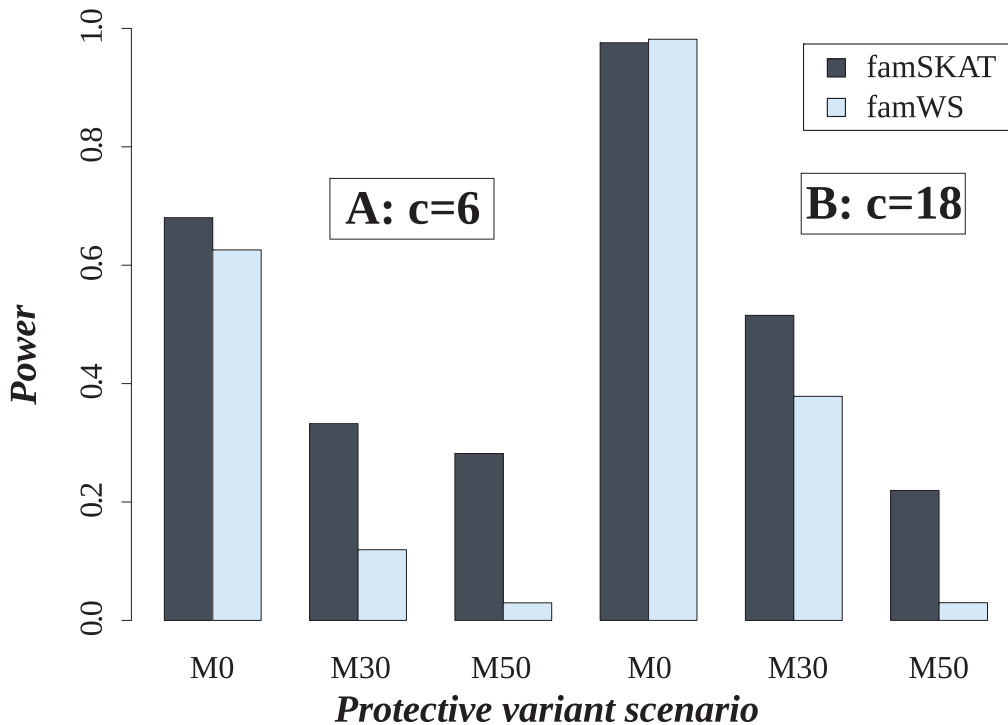

Supplement: NIHMS554262-supplement-Figure_S6.pdf [file NIHMS554262-supplement-Figure_S6.pdf]

# HighLD, $\alpha=0.001$

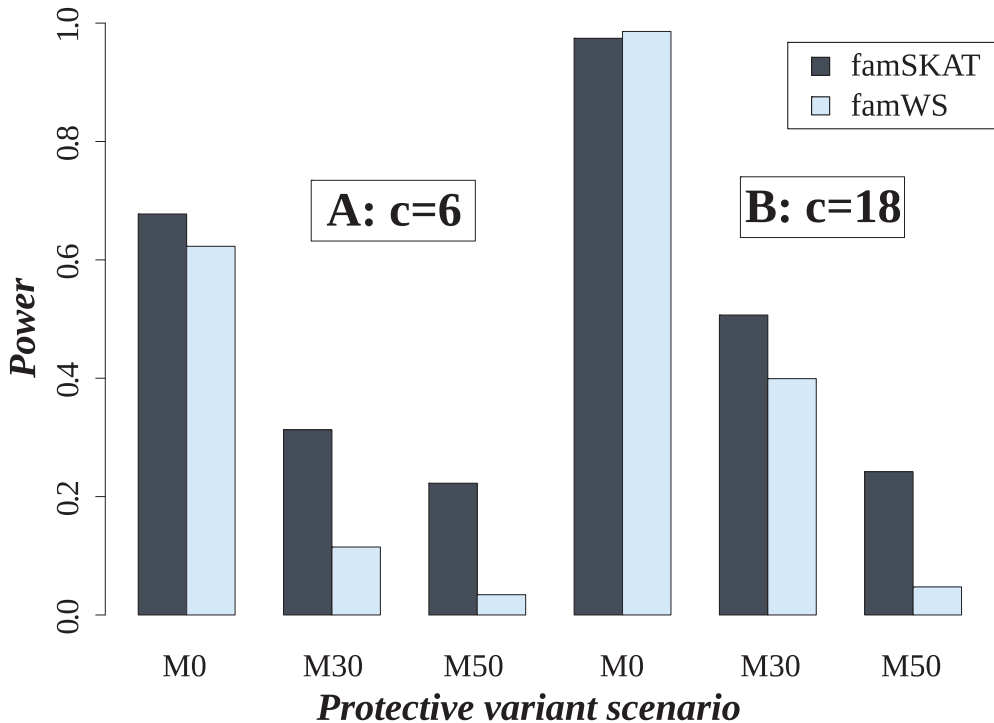

Supplement: NIHMS554262-supplement-Figure_S7.pdf [file NIHMS554262-supplement-Figure_S7.pdf]

*c=18 causal variants, alpha=0.001*

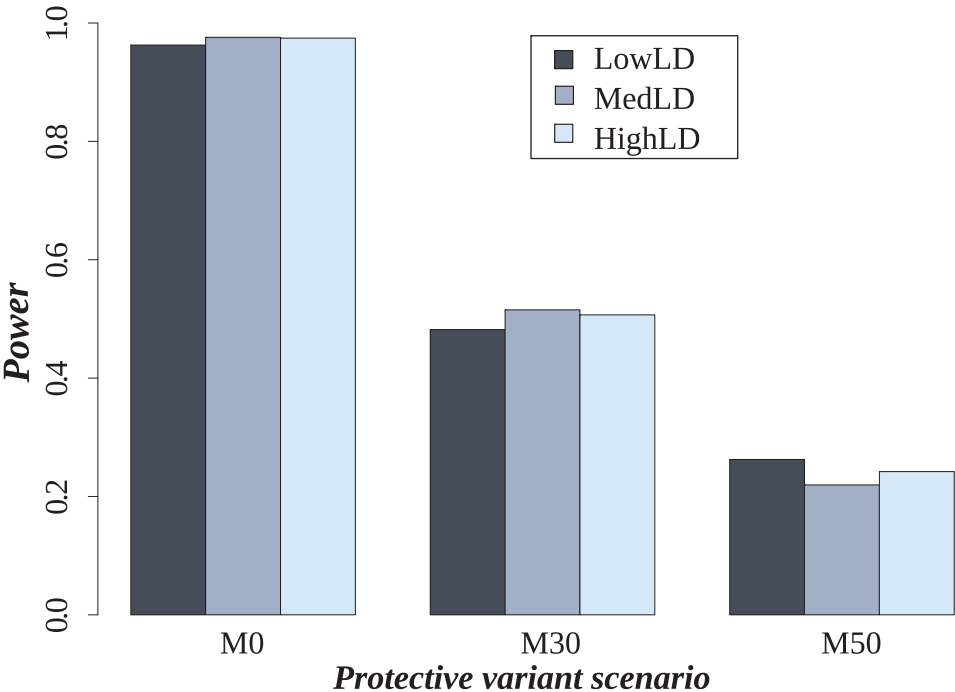

Supplement: NIHMS554262-supplement-Figure_S8.pdf [file NIHMS554262-supplement-Figure_S8.pdf]

*HighLD, c=6 causal variants, alpha=0.001*

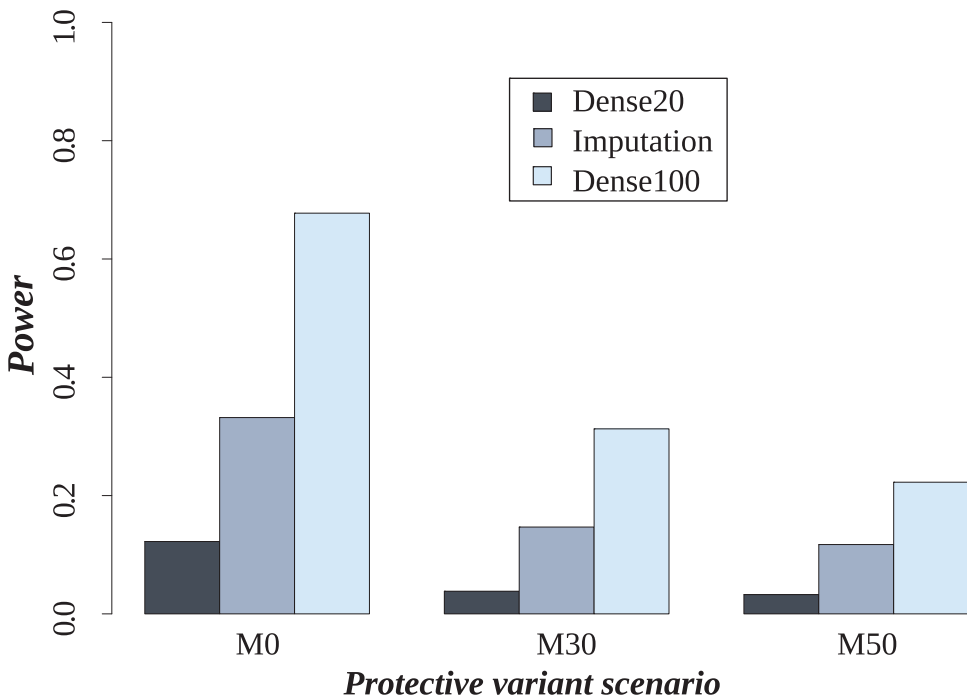

Supplement: NIHMS554262-supplement-Figure_S9.pdf [file NIHMS554262-supplement-Figure_S9.pdf]
